# Supplementary material for: Sulfonic Acid-Functionalized SBA-15 as Strong Cation-Exchange Sorbent for Solid-Phase Extraction of Atropine and Scopolamine in Gluten-Free Grains and Flours
Source: PubMed Central journal article supplement (PMC7763219; doi:10.3390/foods9121854), 2020-12-12
Supplement: foods-09-01854-s001.pdf [file foods-09-01854-s001.pdf]

## Supplementary material

**Table S1.** Samples analysed in this work.

| <b>Code</b>   | <b>Name</b>  | <b>Scientific name</b>      | <b>Type</b>   | <b>Format</b> | <b>Type of farming</b> | <b>Additional Information</b> |
|---------------|--------------|-----------------------------|---------------|---------------|------------------------|-------------------------------|
| <b>Bu-F1O</b> | Buckwheat    | <i>Fagopyrum Esculentum</i> | Pseudo-cereal | Flour         | Organic                | -                             |
| <b>Bu-F2O</b> | Buckwheat    | <i>Fagopyrum Esculentum</i> | Pseudo-cereal | Flour         | Organic                | -                             |
| <b>Bu-GC</b>  | Buckwheat    | <i>Fagopyrum Esculentum</i> | Pseudo-cereal | Grain         | Conventional           | -                             |
| <b>Qu-GO</b>  | Quinoa       | <i>Chenopodium quinoa</i>   | Pseudo-cereal | Grain         | Organic                | -                             |
| <b>Am-GO</b>  | Amaranth     | <i>Amaranthus spp</i>       | Pseudo-cereal | Grain         | Organic                | -                             |
| <b>Te-FO</b>  | Teff         | <i>Eragrostis tef</i>       | Cereal        | Flour         | Organic                | Whole flour                   |
| <b>Co-RFC</b> | Corn         | <i>Zea mays</i>             | Cereal        | Flour         | Conventional           | Refined                       |
| <b>Co-FO</b>  | Corn         | <i>Zea mays</i>             | Cereal        | Flour         | Organic                | -                             |
| <b>bCo-FC</b> | Blue corn    | <i>Zea mays</i>             | Cereal        | Flour         | Conventional           | -                             |
| <b>So-FO</b>  | Sorghum      | <i>Sorghum bicolor</i>      | Cereal        | Flour         | Organic                | -                             |
| <b>Mi-GO</b>  | Millet       | <i>Panicum miliaceum</i>    | Cereal        | Grain         | Organic                | Peeled                        |
| <b>rLe-FO</b> | Red lentil   | <i>Lens culinaris</i>       | Legume        | Flour         | Organic                | -                             |
| <b>gLe-FO</b> | Green lentil | <i>Lens culinaris</i>       | Legume        | Flour         | Organic                | -                             |
| <b>Ch-FC</b>  | Chickpea     | <i>Cicer arietinum</i>      | Legume        | Flour         | Conventional           | -                             |
| <b>Pe-FC</b>  | Pea          | <i>Pisum sativum</i>        | Legume        | Flour         | Conventional           | -                             |

Table S2. Information declared in the nutrition facts label of the samples analysed in this work.

| Sample       | Per 100 g |                        |                   |                     |           |             |            |
|--------------|-----------|------------------------|-------------------|---------------------|-----------|-------------|------------|
|              | Fat (g)   | Of which saturated (g) | Carbohydrates (g) | Of which sugars (g) | Fibre (g) | Protein (g) | Sodium (g) |
| Buckwheat *  | 3.2       | 0.66                   | 65.9              | 1.16                | 3         | 12.9        | 0.001      |
| Quinoa       | 5.94      | 0.53                   | 62.44             | 1.6                 | -         | 12.19       | -          |
| Amaranth     | 7         | 1.5                    | 65.2              | 1.7                 | 6.7       | 13.6        | 0          |
| Teff         | 3.3       | 0.8                    | 60.1              | 3.2                 | 5.9       | 8.8         | 0.08       |
| Refined Corn | <0.5      | <0.1                   | 86                | 0                   | 1         | <0.5        | <0.01      |
| Corn         | 3         | 1                      | 66                | 2                   | -         | 9           | 0.002      |
| Blue Corn    | 2         | 0.4                    | 80.3              | 0                   | -         | 6.6         | 0          |
| Sorghum      | 2.6       | 0.4                    | 72                | 1.3                 | 4.3       | 8.1         | 0.01       |
| Millet       | 4.2       | 0.72                   | 64.3              | 8.2                 | 8.5       | 11.2        | 0.01       |
| Red Lentil   | 2.6       | 0.2                    | 54.9              | 2.3                 | 5.2       | 27.2        | 0.003      |
| Green Lentil | 2.2       | 0.4                    | 59.2              | 0.4                 | 10.8      | 25          | <0.02      |
| Chickpea     | 6.5       | 0.8                    | 55.7              | 7.4                 | 9.67      | 21.33       | <0.1       |
| Pea          | 1         | 0                      | 64                | 0                   | 6         | 22          | 0          |

\* Buckwheat flour of organic farming sample (Bu-F1O)

Table S3. Instrumental validation parameters of the HPLC/MS-MS separation.

| Parameters                               | Concentrations       | Atropine                            | Scopolamine                         |
|------------------------------------------|----------------------|-------------------------------------|-------------------------------------|
| Linear range ( $\mu\text{g/mL}$ )        |                      | 0.005- 5                            | 0.005 - 5                           |
| Linearity                                |                      | $7.3 \cdot 10^8 x + 1.5 \cdot 10^7$ | $3.3 \cdot 10^8 x + 1.8 \cdot 10^7$ |
| R <sup>2</sup>                           |                      | 0.998                               | 0.996                               |
| Slope RSD%                               |                      | 7                                   | 2                                   |
| LOD <sup>a</sup> ( $\mu\text{g/L}$ )     |                      | 0.004                               | 0.014                               |
| LOQ <sup>b</sup> ( $\mu\text{g/L}$ )     |                      | 0.013                               | 0.05                                |
| Repeatability, RSD%                      | 0.05 $\mu\text{g/L}$ | 2                                   | 4                                   |
|                                          | 5 $\mu\text{g/L}$    | 1                                   | 2                                   |
|                                          | 200 $\mu\text{g/L}$  | 1                                   | 1                                   |
|                                          | 5000 $\mu\text{g/L}$ | 2                                   | 1                                   |
| Whithin-laboratory reproducibility, RSD% | 0.05 $\mu\text{g/L}$ | 5                                   | 4                                   |
|                                          | 5 $\mu\text{g/L}$    | 5                                   | 8                                   |
|                                          | 200 $\mu\text{g/L}$  | 5                                   | 3                                   |
|                                          | 5000 $\mu\text{g/L}$ | 7                                   | 7                                   |

<sup>a</sup> Limit of detection.

<sup>b</sup> Limit of quantification.

**Table-S4.** Evaluation of the matrix effect comparing the spiked sample (0.1 mg/kg) with a standard solution of atropine and scopolamine with the same concentration\*.

| Sample       | Atropine    |         |         |
|--------------|-------------|---------|---------|
|              | Group 1     | Group 2 | Group 3 |
| Buckwheat    | Bu-F1O      |         |         |
| Quinoa       | Qu-GO       |         |         |
| Corn         | Co-RFC      |         |         |
| Blue corn    | bCo-FC      |         |         |
| Corn         | Co-FO       |         |         |
| Teff         | Te-FO       |         |         |
| Millet       | Mi-GO       |         |         |
| Sorghum      | So-FO       |         |         |
| Amaranth     |             | Am-GO   |         |
| Chickpea     |             | Ch-FC   |         |
| Red lentil   |             | rLe-FO  |         |
| Pea          |             |         | Pe-FC   |
| Green lentil |             |         | gLe-FO  |
| Sample       | Scopolamine |         |         |
|              | Group 1     | Group 2 | Group 3 |
| Corn         | Co-RFC      |         |         |
| Buckwheat    | Bu-F1O      |         |         |
| Quinoa       | Qu-GO       |         |         |
| Sorghum      | So-FO       |         |         |
| Corn         | Co-RFC      |         |         |
| Millet       | Mi-GO       |         |         |
| Teff         | Te-FO       |         |         |
| Blue corn    | bCo-FC      |         |         |
| Red lentil   |             | rLe-FO  |         |
| Chickpea     |             | Ch-FC   |         |
| Amaranth     |             | Am-GO   |         |
| Green lentil |             |         | Pe-FC   |
| Pea          |             |         | gLe-FO  |

\* Data were statistically compared by Analysis of Variance (ANOVA) and Duncan's Multiple range test.

**Table S5.** Recovery, intra-day and inter-day repeatability of the method calculated on a sorghum flour sample (So-FO) spiked with atropine and scopolamine.

| <b>Analyte level</b> | <b>Recovery<br/>(% ± SD)</b> | <b>Intra-day precision<br/>(%RSD)</b> | <b>Inter-day precisión<br/>(%RSD)</b> |
|----------------------|------------------------------|---------------------------------------|---------------------------------------|
| Atropine (µg/kg)     |                              |                                       |                                       |
| 1.5                  | 105 ± 9                      | -                                     | -                                     |
| 5                    | 93 ± 7                       | 4                                     | 8                                     |
| 100                  | 94 ± 12                      | 11                                    | 13                                    |
| Scopolamine (µg/kg)  |                              |                                       |                                       |
| 2.4                  | 96 ± 8                       | -                                     | -                                     |
| 5                    | 96 ± 17                      | 6                                     | 18                                    |
| 100                  | 93 ± 17                      | 8                                     | 19                                    |

**Table S6.** Textural properties and functionalization degree of five different batches of prepared M-SBA-15-SO<sub>3</sub><sup>-</sup> sorbent.

| M-SBA-15-SO <sub>3</sub> <sup>-</sup> | S <sub>BET</sub><br>(m <sup>2</sup> /g) <sup>a</sup> | Pore volume<br>(cm <sup>3</sup> /g) <sup>b</sup> | Pore size<br>(Å) <sup>c</sup> | L <sub>0</sub><br>(mmol S/g) <sup>d</sup> |
|---------------------------------------|------------------------------------------------------|--------------------------------------------------|-------------------------------|-------------------------------------------|
| <b>Batch 1</b>                        | 475.1                                                | 0.56                                             | 48.5                          | 0.944                                     |
| <b>Batch 2</b>                        | 461.8                                                | 0.54                                             | 49.4                          | 0.981                                     |
| <b>Batch 3</b>                        | 533.6                                                | 0.61                                             | 49.5                          | 1.049                                     |
| <b>Batch 4</b>                        | 507.4                                                | 0.58                                             | 49.1                          | 1.151                                     |
| <b>Batch 5</b>                        | 459.4                                                | 0.52                                             | 50.0                          | 0.928                                     |

<sup>a</sup> S<sub>BET</sub>: Specific surface area calculated by Brunauer-Emmett-Teller (BET) method. <sup>b</sup> Pore volume: Total pore volume measured at relative P/P<sub>0</sub>=0.97. <sup>c</sup> Pore size: Pore diameter estimated by Barret-Joyner-Halenda (BJH) model applied in the desorption branch. <sup>d</sup> L<sub>0</sub>: Functionalization degree estimated through the %S determined by elemental analysis.

**Table S7.** RASFF notifications of the last 5 years (2015-2020) on atropine and scopolamine in cereal and bakery products.

| <b>Date</b> | <b>Country</b> | <b>Subject</b>                                                                                                                                                           | <b>Action taken</b>            | <b>Decision</b> |
|-------------|----------------|--------------------------------------------------------------------------------------------------------------------------------------------------------------------------|--------------------------------|-----------------|
| 04/06/2015  | Germany        | Atropine (198.5 µg/kg - ppb) and scopolamine (45 µg/kg - ppb) in organic polenta cornmeal from Germany                                                                   | Recall from consumers          | Serious         |
| 18/09/2015  | Germany        | Atropine (29 µg/kg - ppb) and scopolamine (6 µg/kg - ppb) in microwave popcorn from Spain                                                                                | Recall from consumers          | Serious         |
| 26/11/2015  | Czech Republic | Atropine (1200; 1500 µg/kg - ppb) and scopolamine (360; 460 µg/kg - ppb) in sorghum flour from the Czech Republic with raw material from the Czech Republic and Slovakia | Withdrawal from the market     | Serious         |
| 01/02/2016  | Czech Republic | Atropine (180; 130 µg/kg - ppb) and scopolamine (36;27 µg/kg - ppb) in gluten-free baking mix and related products based on sorghum from the Czech Republic              | Destruction                    | Serious         |
| 13/04/2016  | Czech Republic | Atropine (7.9 µg/kg - ppb) in baby porridge without milk from Spain                                                                                                      | Withdrawal from the market     | Undecided       |
| 22/07/2016  | Austria        | Atropine (10.5; 12.2; 12.3 µg/kg - ppb) and scopolamine (2.0; 3.8; 3.1 µg/kg - ppb) in corn from Germany                                                                 | Withdrawal from the market     | Serious         |
| 20/09/2016  | Austria        | Atropine (23.5 µg/kg - ppb) and scopolamine (9.5 µg/kg - ppb) in millet flour from Hungary                                                                               | Public warning - press release | Serious         |
| 24/05/2018  | Germany        | Atropine (6.60 µg/kg - ppb) and scopolamine (1.77 µg/kg - ppb) in popcorn from France                                                                                    | Withdrawal from the market     | Serious         |
| 05/06/2018  | Germany        | Scopolamine (10.3 µg/kg - ppb) in popcorn in grain from Argentina                                                                                                        | Recall from consumers          | Serious         |
| 26/09/2018  | Germany        | Atropine (60.7 µg/kg - ppb) and scopolamine (38.8 µg/kg - ppb) in organic muesli from Austria                                                                            | Recall from consumers          | Serious         |
| 20/12/2018  | France         | Atropine (53 µg/kg - ppb) and scopolamine (20 µg/kg - ppb) in organic buckwheat flour from France                                                                        |                                | Serious         |
| 01/04/2019  | Croatia        | Atropine (4.5 µg/kg - ppb) and scopolamine (4.3 µg/kg - ppb) in corn grits from Serbia                                                                                   | Public warning - press release | Serious         |
| 06/08/2019  | Netherlands    | Atropine (2.2 µg/kg - ppb) and scopolamine (2.7 µg/kg - ppb) in breakfast porridge 8 cereals with honey from Spain                                                       | Withdrawal from the market     | Undecided       |
| 26/08/2019  | France         | Atropine (47 µg/kg - ppb) and scopolamine (30 µg/kg - ppb) in organic buckwheat flour from France                                                                        | Recall from consumers          | Serious         |
| 24/01/2020  | Germany        | Atropine (19 µg/kg - ppb) and scopolamine (6.4 µg/kg - ppb) in organic soy flakes from Austria, with raw material from the Czech Republic                                | Withdrawal from the market     | Serious         |

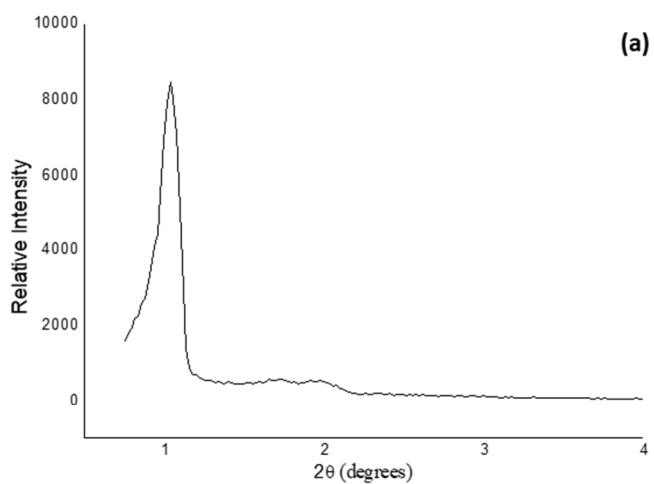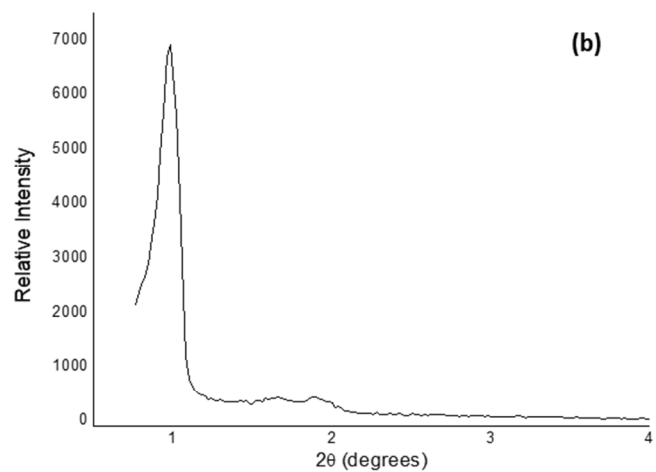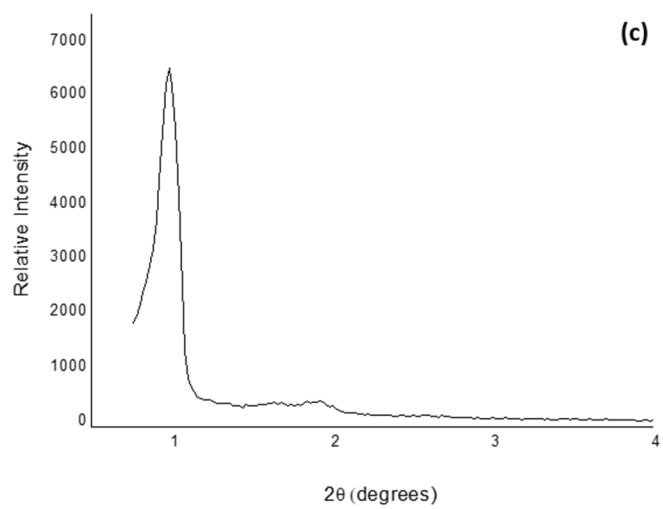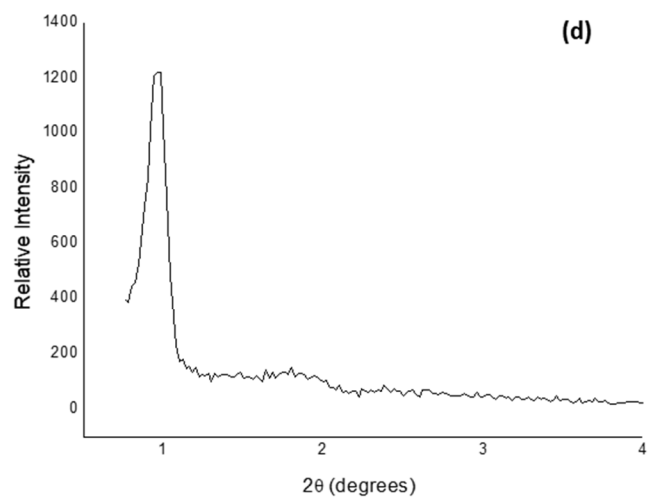

**Figure S1.** XRD patterns of: (a) SBA-15; (b) L-SBA-15-SO<sub>3</sub><sup>-</sup>; (c) M-SBA-15-SO<sub>3</sub><sup>-</sup> and (d) H-SBA-15-SO<sub>3</sub><sup>-</sup>.



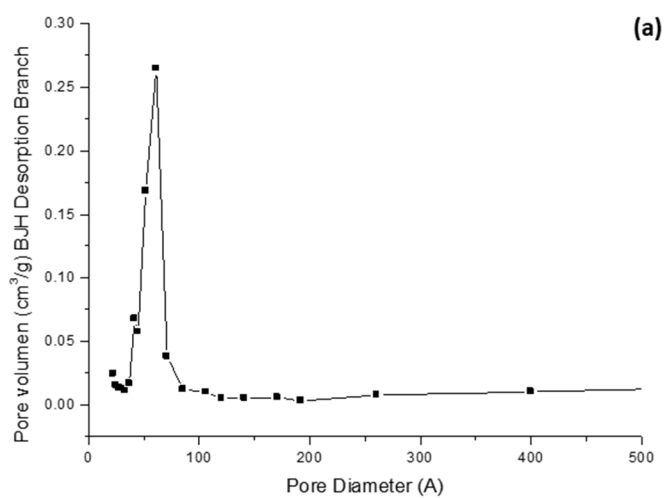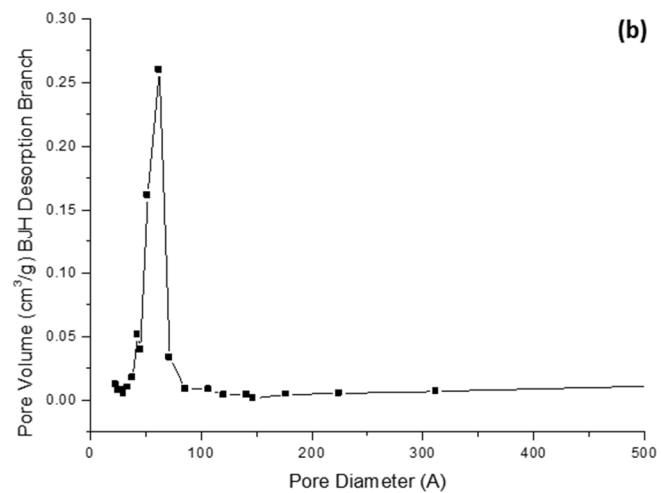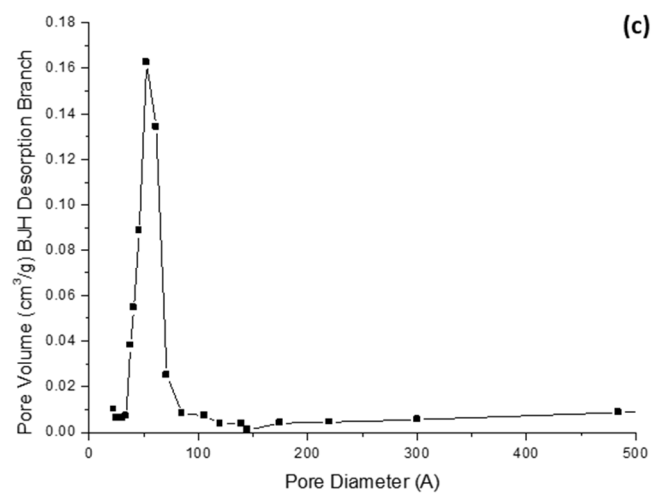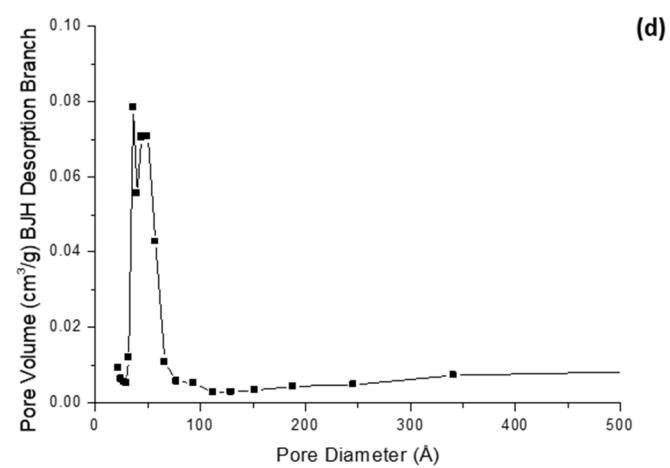

**Figure S2.** Pore size distribution of: (a) SBA-15, (b) L-SBA-15-SO<sub>3</sub><sup>-</sup>, (c) M-SBA-15-SO<sub>3</sub><sup>-</sup> and (d) H-SBA-15-SO<sub>3</sub><sup>-</sup>.
